# Supplementary material
Source: PubMed Central journal article supplement (PMC6448151)
Supplement: NIHMS1008022-supplement-Supplement.pdf [file NIHMS1008022-supplement-Supplement.pdf]

## SUPPLEMENTARY MATERIALS

### The Ruthenium Isotopic Composition of the Oceanic Mantle

K.R. Bermingham\* and R.J. Walker

*Isotope Geochemistry Laboratory, Department of Geology, University of Maryland, College Park, MD-20740 USA*

\*Corresponding author: K.R. Bermingham ([kberming@umd.edu](mailto:kberming@umd.edu))

The Ru concentration, mass digested, and  $\mu^{\text{Ru}}$  values for chromitites, Os-Ir-Ru alloys, and iron meteorites studied are presented in SM1. The  $\mu^{189}\text{Os}$  and cosmic ray exposure uncorrected  $\mu^{\text{Ru}}$  for IAB iron meteorites are presented in SM2.

**SM1.** The Ru concentration, mass digested, and  $\mu^x$ Ru values for chromitites, Os-Ir-Ru alloys, and iron meteorites studied here. Data are corrected using the Nier reduction method unless otherwise specified. The uncertainties associated with individual analyses are the internal error (2SE) associated with the measurement, unless there is only one analysis for the sample in which case the uncertainties are the 2SD of the standards measured during the relevant campaign. The uncertainties for sample means, where  $n < 3$ , are reported as the 2SD of the *Alfa Asear* standard, or the sample, whichever was greater. The uncertainties for sample means, where  $n \geq 3$ , are the 2SE associated with the multiple measurements of the sample. The uncertainties associated with the IAB iron meteorite group are defined by the extent of the error envelop at  $\mu^{189}\text{Os} = 0$  for the trend  $\mu^{189}\text{Os}$  vs.  $\mu^x\text{Ru}$ , obtained using the ISOPLOT program (Ludwig, 2003). The uncertainties associated with the oceanic mantle are an average of the 2SD of repeated analysis of the *Alfa Asear* standard from each measurement campaign.

| Location/Sample   | Ru <sup>†</sup> | Mass (g) | $\mu^{96}\text{Ru}$ | $\pm$ | $\mu^{98}\text{Ru}$ | $\pm$ | $\mu^{100}\text{Ru}$ | $\pm$ | $\mu^{102}\text{Ru}$ | $\pm$ | $\mu^{104}\text{Ru}$ | $\pm$ |
|-------------------|-----------------|----------|---------------------|-------|---------------------|-------|----------------------|-------|----------------------|-------|----------------------|-------|
| SOC(UK)           |                 |          |                     |       |                     |       |                      |       |                      |       |                      |       |
| C1                | 17 ppm          | 0.5      | -39.9               | 55.4  | -143.6              | 149.8 | 4.0                  | 9.0   | 30.0                 | 34.6  | 11.9                 | 29.2  |
| C2                | 7 ppm           | 1        | 21.0                | 55.4  | 39.3                | 149.8 | 4.0                  | 9.0   | 10.4                 | 34.6  | -3.7                 | 29.2  |
| C3_a              | 20 ppm          | 0.5      | 30.3                | 15.5  | -4.3                | 18.4  | -1.4                 | 5.4   | 0.1                  | 5.9   | -9.2                 | 10.9  |
| C3_b              |                 |          | 8.5                 | 18.6  | 87.5                | 27.5  | -0.1                 | 6.8   | 3.8                  | 8.1   | 11.8                 | 12.8  |
| C3_c              |                 |          | 17.8                | 9.3   | 4.9                 | 9.2   | -1.4                 | 2.7   | 3.8                  | 3.8   | 16.3                 | 6.4   |
| C3_d              |                 |          | 42.7                | 15.5  | 41.6                | 27.5  | 1.3                  | 5.4   | 8.7                  | 5.4   | 34.6                 | 11.8  |
| C3_mean           |                 |          | 24.8                | 14.9  | 32.4                | 41.7  | -0.4                 | 1.3   | 4.1                  | 3.5   | 13.4                 | 18.0  |
| JOC (US)          |                 |          |                     |       |                     |       |                      |       |                      |       |                      |       |
| M3_6              | ≤14 wt.%        | <0.05    | 36.4                | 72.8  | -24.0               | 133.1 | 7.4                  | 6.8   | 10.3                 | 22.2  | 53.3                 | 55.7  |
| M8_02             | ≤15 wt.%        | <0.05    | 60.4                | 72.8  | -32.1               | 133.1 | -4.5                 | 6.8   | 4.0                  | 22.2  | 12.2                 | 55.7  |
| L5_3_a            | ≤6 wt.%         | <0.05    | 66.3                | 16.0  | 27.3                | 26.0  | 2.6                  | 5.8   | -19.9                | 6.5   | -12.1                | 11.8  |
| L5_3_b            |                 |          | 15.6                | 15.4  | -141.3              | 24.2  | -3.7                 | 5.4   | 30.0                 | 6.4   | 43.8                 | 12.0  |
| L5_3_c            |                 |          | 15.7                | 20.1  | 7.0                 | 33.5  | -5.4                 | 6.7   | -0.5                 | 7.9   | 22.4                 | 14.6  |
| L5_3_d            |                 |          | 12.6                | 10.8  | -3.0                | 16.3  | 1.5                  | 3.9   | -18.9                | 4.7   | -31.9                | 8.4   |
| L5_3_e            |                 |          | 36.6                | 23.1  | 29.0                | 36.8  | 2.6                  | 8.1   | 26.0                 | 9.3   | 40.2                 | 17.5  |
| L5_3_mean         |                 |          | 29.4                | 20.4  | -16.2               | 63.7  | -0.5                 | 3.4   | 3.3                  | 21.3  | 12.5                 | 29.7  |
| Witwatersand (SA) |                 |          |                     |       |                     |       |                      |       |                      |       |                      |       |
| B-1_a             | 5-55 wt.%       | <0.05    | 8.3                 | 8.1   | -10.2               | 10.5  | 0.3*                 | 2.5*  | 2.6                  | 3.5   | 4.3                  | 6.0   |
| B-1_b             |                 |          | 40.3                | 10.4  | 55.8                | 14.6  | 0.4*                 | 3.7*  | 5.5                  | 4.5   | 29.7                 | 7.6   |
| B-1_c             |                 |          | 31.2                | 9.3   | -40.1               | 12.6  | 4.1*                 | 3.3*  | 14.5                 | 4.1   | 27.4                 | 6.9   |
| B-1_d             |                 |          | 34.2                | 10.3  | -12.8               | 14.4  | 1.5*                 | 3.3*  | 11.0                 | 4.3   | 26.2                 | 7.8   |
| B-1_e             |                 |          | 25.0                | 8.4   | 6.0                 | 12.1  | -1.1*                | 3.0*  | -5.1                 | 3.8   | -1.9                 | 6.6   |
| B-1_f             |                 |          | 53.9                | 9.1   | 99.9                | 12.3  | -4.4*                | 3.2*  | -19.1                | 3.9   | 3.7                  | 6.9   |
| B-1_g             |                 |          | 26.3                | 9.3   | 6.7                 | 13.2  | 1.8*                 | 3.4*  | 0.2                  | 4.0   | 18.8                 | 7.2   |
| B-1_mean          |                 |          | 31.3                | 10.7  | 15.0                | 35.8  | 0.4*                 | 2.0*  | 1.4                  | 8.4   | 15.4                 | 9.9   |
| Urals (RU)        |                 |          |                     |       |                     |       |                      |       |                      |       |                      |       |
| Kushva_a          |                 | <0.05    | 106.3               | 15.8  | 299.7               | 12.6  | -4.4                 | 5.1   | -54.2                | 6.6   | 14.1                 | 12.0  |
| Kushva_b          |                 |          | 52.4                | 9.0   | 63.0                | 8.2   | 2.4                  | 3.1   | -13.0                | 3.9   | 3.5                  | 7.3   |
| Kushva_c          |                 |          | -5.8                | 9.6   | -139.1              | 9.1   | 10.0                 | 3.4   | 42.3                 | 4.1   | 61.2                 | 7.0   |
| Kushva_mean       |                 |          | 51.0                | 98.7  | 74.5                | 327.7 | 2.7                  | 10.9  | -8.3                 | 71.6  | 26.3                 | 37.0  |

| Location/Sample   | Ru <sup>†</sup> | Mass (g) | <sup>96</sup> Ru/ <sup>101</sup> Ru | ±     | <sup>98</sup> Ru/ <sup>101</sup> Ru | ±     | <sup>100</sup> Ru/ <sup>101</sup> Ru | ±    | <sup>102</sup> Ru/ <sup>101</sup> Ru | ±    | <sup>104</sup> Ru/ <sup>101</sup> Ru | ±    |
|-------------------|-----------------|----------|-------------------------------------|-------|-------------------------------------|-------|--------------------------------------|------|--------------------------------------|------|--------------------------------------|------|
| Nizhny Tagil_a    |                 | <0.05    | -40.7                               | 19.6  | -82.8                               | 17.3  | 14.9                                 | 6.3  | 39.8                                 | 7.8  | 57.8                                 | 15.7 |
| Nizhny Tagil_b    |                 |          | 83.5                                | 14.8  | 89.0                                | 13.1  | 3.2                                  | 5.0  | -5.8                                 | 6.2  | 46.0                                 | 12.1 |
| Nizhny Tagil_mean |                 |          | 21.4                                | 125.0 | 3.1                                 | 247.2 | 9.1                                  | 7.5  | 17.0                                 | 71.9 | 51.9                                 | 13.9 |
| Guli_a            | 65-98 wt%       | <0.05    | 92.3                                | 20.6  | 212.5                               | 15.9  | 4.3*                                 | 6.5* | -35.5                                | 8.3  | 14.0                                 | 15.1 |
| Guli_b            |                 |          | 113.9                               | 13.5  | 248.4                               | 10.5  | -4.8*                                | 4.7* | -35.4                                | 6.1  | 20.4                                 | 12.2 |
| Guli_c            |                 |          | 57.6                                | 10.9  | 117.8                               | 9.0   | 3.9*                                 | 3.5* | -9.9                                 | 4.6  | 27.0                                 | 8.0  |
| Guli_d            |                 |          | 79.1                                | 11.2  | 79.6                                | 10.9  | 2.8*                                 | 4.0* | -10.7                                | 4.5  | 15.3                                 | 7.9  |
| Guli_mean         |                 |          | 85.7                                | 39.9  | 164.6                               | 117.6 | 1.6*                                 | 3.9* | -22.9                                | 25.1 | 19.2                                 | 8.1  |
| Tasmania (AU)     |                 |          |                                     |       |                                     |       |                                      |      |                                      |      |                                      |      |
| Bald Hills        |                 |          | 85.6                                | 11.2  | 192.7                               | 104.1 | -7.8                                 | 8.6  | 32.7                                 | 5.3  | -19.2                                | 37.9 |
| Savage River      |                 |          | 34.1                                | 7.4   | -13.4                               | 104.1 | -6.8                                 | 8.6  | 3.1                                  | 3.2  | 15.6                                 | 37.9 |
| Papua New Guinea  |                 |          |                                     |       |                                     |       |                                      |      |                                      |      |                                      |      |
| Yodda_a           |                 | <0.05    | 41.5                                | 9.4   | 71.6                                | 9.7   | 1.5                                  | 3.3  | -10.1                                | 4.4  | 4.8                                  | 7.7  |
| Yodda_b           |                 |          | 16.6                                | 10.5  | 73.3                                | 10.1  | 6.5                                  | 3.3  | -5.5                                 | 4.5  | -3.7                                 | 8.1  |
| Yodda_c           |                 |          | 68.1                                | 12.8  | 93.4                                | 11.2  | 4.1                                  | 4.7  | -13.9                                | 5.7  | 30.1                                 | 9.9  |
| Yodda_mean        |                 |          | 42.0                                | 29.7  | 79.5                                | 14.0  | 4.1                                  | 2.9  | -9.8                                 | 4.8  | 10.4                                 | 20.3 |
| IAB (MG,sLL)      | 3.5-9.6 ppm     | 0.5 - 1  | 36.0                                | 67.0  | 74.0                                | 70.0  | 0.9                                  | 3.0  | -0.7                                 | 14.0 | 16.8                                 | 15.0 |
| Oceanic mantle    |                 |          | 39.0                                | 77.5  | 38.2                                | 175.4 | 1.2                                  | 7.2  | 0.6                                  | 41.5 | 17.2                                 | 48.0 |

<sup>†</sup>Ruthenium concentration.

\*Data obtained using the measured oxygen reduction scheme.

**SM2.**  $\mu^{189}\text{Os}$  and cosmic ray exposure uncorrected  $\mu^a\text{Ru}$  for IAB iron meteorites. The uncertainties for multiple analyses of individual samples, where  $n < 3$ , are reported as the 2SD of the standard, or the sample, whichever was greater. The uncertainties for individual samples, where  $n \geq 3$ , are the 2SE associated with the multiple measurements of the sample. Where  $n$  is the number of analyses of a single sample solution for (a) Ru and (b) Os.

| Sample                          | $n^a$ | $\mu^{96}\text{Ru}$ | $\pm$ | $\mu^{98}\text{Ru}$ | $\pm$ | $\mu^{100}\text{Ru}$ | $\pm$ | $\mu^{102}\text{Ru}$ | $\pm$ | $\mu^{104}\text{Ru}$ | $\pm$ | $n^b$ | $\mu^{189}\text{Os}$ | $\pm$ |
|---------------------------------|-------|---------------------|-------|---------------------|-------|----------------------|-------|----------------------|-------|----------------------|-------|-------|----------------------|-------|
| IAB Main Group                  |       |                     |       |                     |       |                      |       |                      |       |                      |       |       |                      |       |
| Campo del Cielo <sub>mean</sub> | 1     | 115.5               | 61.4  | 190.1               | 144.0 | 2.1                  | 5.6   | -26.6                | 29.2  | 17.6                 | 30.3  | 2     | 4.0                  | 5.0   |
| Morasko <sub>mean</sub>         | 3     | -3.2                | 47.7  | -5.3                | 155.0 | 8.5                  | 4.9   | 16.2                 | 50.8  | 8.4                  | 32.8  | 1     | -12.0                | 4.0   |
| Hope                            | 1     | 0.4                 | 61.4  | -80.9               | 144.0 | -2.1                 | 5.6   | 28.7                 | 29.2  | 41.5                 | 30.3  | 3     | -3.5                 | 5.9   |
| IAB sLL                         |       |                     |       |                     |       |                      |       |                      |       |                      |       |       |                      |       |
| Bischtube                       | 1     | 17.4                | 82.5  | 65.3                | 142.1 | 15.9                 | 9.2   | 13.9                 | 21.9  | 2.1                  | 30.8  | 3     | -28.0                | 5.0   |
| Deport <sub>mean</sub>          | 2     | 34.4                | 20.0  | 28.7                | 121.3 | 41.7                 | 13.5  | 33.6                 | 27.6  | 16.9                 | 31.5  | 3     | -107.0               | 3.0   |
| Toluca <sub>mean</sub>          | 1     | 55.0                | 61.4  | 156.4               | 144.0 | -0.2                 | 5.6   | -11.1                | 29.2  | 7.1                  | 30.3  | 4     | -5.0                 | 6.0   |

## References

1. Ludwig K. R. (2003) User's Manual for Isoplot 3.00. Berkeley Geochronology Center Special Publication No. 4, Berkeley, CA, 70pp.
